# Supplementary material for: Magnetic mesoporous silica incorporated with TiO2for selective and rapid capture of peptides
Source: Royal Society of Chemistry journal article supplement (doi:10.1039/c3ra46887a), 2014-01-01
Supplement: c3ra46887a.pdf [file c3ra46887a.pdf]

## Supporting Information

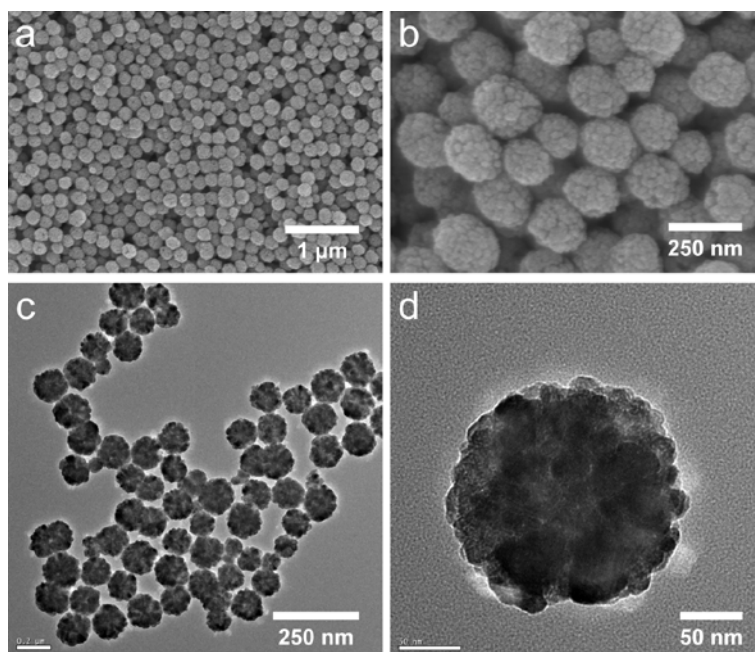

**Fig. S1** SEM (a, b) and TEM (c, d) images of the Fe<sub>3</sub>O<sub>4</sub> microspheres

**Table S1** The peptides captured from BSA digest by different affinity materials and identified by MALDI-TOF MS

| Start-End | MW       | Sequence              | MMS | ZipTipC18 | Mesoporous silica |
|-----------|----------|-----------------------|-----|-----------|-------------------|
| 29–34     | 711.3664 | K.SEIAHR.F            | √   | √         | √                 |
| 35–44     | 1248.614 | R.FKDLGEEHFK.G        | √   | √         | √                 |
| 37–44     | 973.4505 | K.DLGEEHFK.G          | √   | -         | √                 |
| 66–75     | 1162.623 | K.LVNELTEFAK.T        | √   | √         | √                 |
| 89–100    | 1361.665 | K.SLHTLFGDELCK.V      | √   | -         | -                 |
| 123–130   | 976.4436 | R.NECFLSHK.D          | √   | -         | -                 |
| 131–138   | 885.408  | K.DDSPDLPK.L          | √   | -         | -                 |
| 139–151   | 1518.739 | K.LKPDPNTLCDEFK.A     | √   | -         | -                 |
| 139–155   | 1961.94  | K.LKPDPNTLCDEFKADEK.K | √   | -         | -                 |
| 161–167   | 926.4861 | K.YLYEIAR.R           | √   | √         | √                 |
| 168–183   | 2044.021 | R.RHPYFYAPPELLYYANK.Y | √   | -         |                   |
| 169–183   | 1887.92  | R.HPYFYAPPELLYYANK.Y  | √   | -         | √                 |
| 198–204   | 700.3942 | K.GACLLPK.I           | √   | -         | -                 |
| 212–218   | 702.4024 | K.VLASSAR.Q           | √   | -         | -                 |
| 229–235   | 819.4603 | K.FGERALK.A           | √   | -         | -                 |
| 229–235   | 819.4603 | K.FGERALK.A           | √   | -         | -                 |
| 233–241   | 1000.582 | R.ALKAWSVAR.L         | √   | -         | -                 |
| 242–248   | 846.4963 | R.LSQKFPK.A           | √   | -         | √                 |
| 246–256   | 1293.697 | K.FPKAEFVEVTK.L       | √   | √         | √                 |
| 286–297   | 1385.613 | K.YICDNQDTISSK.L      | √   | -         | √                 |
| 298–309   | 1417.731 | K.LKECCDKP LLEK.S     | √   | -         | -                 |
| 310–318   | 1014.48  | K.SHCIAEVEK.D         | √   | -         | √                 |
| 341–346   | 751.35   | K.NYQEAK.D            | √   | √         | -                 |
| 347–359   | 1566.735 | K.DAFLGSFLYEYSR.R     | √   | √         | √                 |
| 360–371   | 1438.805 | R.RHPEYAVSVLLR.L      | √   | -         | √                 |
| 361–371   | 1282.703 | R.HPEYAVSVLLR.L       | √   | -         | √                 |
| 402–412   | 1304.709 | K.HLVDEPQNLIK.Q       | √   | √         | √                 |
| 413–420   | 1010.413 | K.QNCDQFEK.L          | √   | -         | √                 |

|                       |          |                      |    |    |    |
|-----------------------|----------|----------------------|----|----|----|
| 421–433               | 1478.788 | K.LGEYGFQNALIVR.Y    | √  | √  | √  |
| 437–451               | 1638.931 | R.KVPQVSTPTLVEVSR.S  | √  | √  | -  |
| 438–451               | 1510.836 | K.VPQVSTPTLVEVSR.S   | √  | -  | -  |
| 452–459               | 816.4818 | R.SLGKVGTR.C         | √  | -  | -  |
| 456–468               | 1464.681 | K.VGTRCCTKPESER.M    | √  | -  | -  |
| 460–468               | 1051.443 | R.CCTKPESER.M        | √  | -  | -  |
| 469–482               | 1666.806 | R.MPCTEDYLSLILNR.L   | √  | -  | -  |
| 483–489               | 840.4527 | R.LCVLHEK.T          | √  | -  | √  |
| 499–507               | 1023.448 | K.CCTESLVNR.R        | √  | -  | -  |
| 508–523               | 1822.892 | R.RPCFSALTPDETYVPK.A | √  | -  | -  |
| 548–557               | 1141.707 | K.KQTALVELLK.H       | √  | -  | √  |
| 549–557               | 1013.612 | K.QTALVELLK.H        | √  | -  | √  |
| 562–568               | 817.4181 | K.ATEEQLK.T          | √  | -  | -  |
| 569–580               | 1398.685 | K.TVMENFVAFVDK.C     | √  | -  | -  |
| 588–597               | 1049.485 | K.EACFAVEGPK.L       | √  | -  | -  |
| 598–607               | 1001.576 | K.LVVSTQTALA.-       | √  | -  | √  |
| Matched peptides      |          |                      | 44 | 10 | 21 |
| Sequence coverage (%) |          |                      | 59 | 16 | 28 |
